# Supplementary material for: Een huis gezien vanaf een dak
Source: Royal Society of Chemistry journal article supplement (doi:10.1039/c5sm01423a), 2012-05-15
Supplement: c5sm01423a1.pdf [file c5sm01423a1.pdf]

## Molecular Structure of Self-healing Polyampholyte Hydrogels Analyzed from Tensile Behaviors

Tao Lin Sun<sup>1</sup>, Feng Luo<sup>1</sup>, Takayuki Kurokawa<sup>1</sup>, Sadia Nazneen Karobi<sup>2</sup>,  
Tasuku Nakajima<sup>1</sup>, Jian Ping Gong<sup>1\*</sup>

<sup>1</sup>Laboratory of Soft and Wet Matter, Faculty of Advanced Life Science, Hokkaido

University, Sapporo 060-0810, Japan

<sup>2</sup> Laboratory of Soft and Wet Matter, Graduate School of Life Science, Hokkaido

University, Sapporo 060-0810, Japan

\*E-mail: [gong@mail.sci.hokudai.ac.jp](mailto:gong@mail.sci.hokudai.ac.jp)

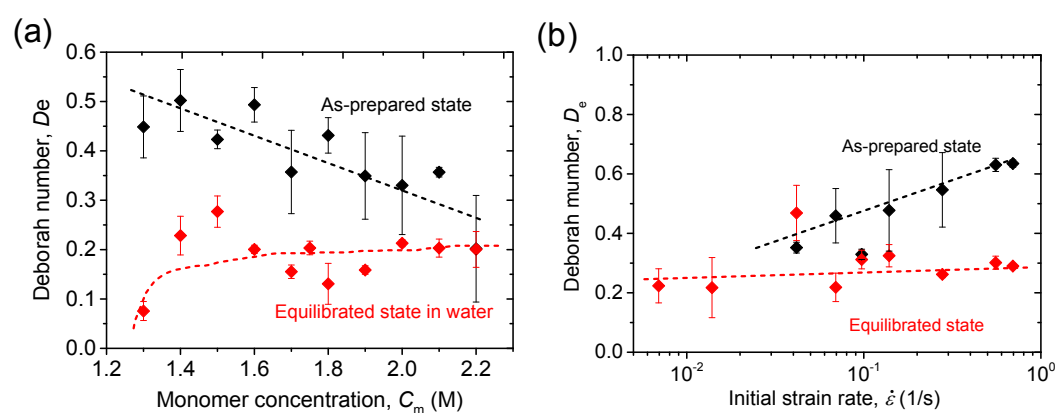

Figure S1. Monomer concentration  $C_m$  (a) and strain rate (b) dependence of Deborah number of viscoelastic part  $De$  for the as-prepared and equilibrated gel, respectively.
